# Supplementary material
Source: publisher figshare collection journal article supplement (https://acs.figshare.com/ndownloader/files/4105663)
Supplement: Supplementary file 1 [file 4105663]

## Sheet: Table S2
	id	% Coverage (>95 conf)	Number of peptides observations	Number of unique peptide observations	Comparison of 6 h vs 0 h		Comparison of 39 h vs 6 h		Comparison of 39 h vs 0 h
					P value of difference	Fold change	P value of difference	Fold change	P value of difference	Fold change
1	A1KR25	14.76	111	15	0.905109	-0.0236993	0.00444492	1.81887	0.000598071	1.79517
2	A2BCY1	29.43	16	9	0.0127821	0.587653	0.510578	-0.12947	0.0245201	0.458183
3	A2PZC0	16.9	25	5	0.203603	0.212473	0.0259729	-0.358232	0.147389	-0.145759
4	A2PZC2	26.16	48	8	0.52049	-0.371262	0.203513	0.551591	0.654777	0.180329
5	A8HMA8	22.84	16	4	0.674334	-0.105094	0.583262	-0.0687767	0.421634	-0.173871
6	A8HMC0	11.19	26	5	0.699268	0.0459483	0.698464	-0.109824	0.78241	-0.0638757
7	A8HME4	15.33	19	6	0.832395	-0.0474925	0.283215	-0.212154	0.0809235	-0.259647
8	A8HME6	11.32	22	6	0.336967	-0.368151	0.165705	0.276442	0.744691	-0.0917084
9	A8HMG7	24.83	23	7	0.729107	0.138962	0.27818	-0.323404	0.488691	-0.184442
10	A8HMQ1	41.15	213	32	0.0396518	0.524066	0.6413	0.0642454	0.00534378	0.588312
11	A8HMS5	11.76	4	2	0.0935797	0.516679	0.0360571	-0.865502	0.196241	-0.348823
12	A8HMT2	1.088	3	1	0.300695	0.329813	0.323471	0.442367	0.024466	0.77218
13	A8HMX2	39.95	122	24	0.983363	-0.00452371	0.0175064	0.836844	0.00512796	0.83232
14	A8HN65	19.64	19	4	0.0242413	0.422882	0.448933	0.178217	0.0143652	0.6011
15	A8HNC0	5.92	4	2	0.163126	-0.672075	0.964363	0.0171642	0.0471462	-0.654911
16	A8HNE8	13.1	21	6	0.0468421	-0.849107	0.00234511	-1.7075	0.000440154	-2.5566
17	A8HNG8	37.61	26	5	0.592604	0.273085	0.0274099	-1.41245	0.0193661	-1.13936
18	A8HNJ8	6.207	5	1	0.82846	-0.1359	0.0544431	-1.2567	0.0133136	-1.3926
19	A8HNN4	13.39	27	10	0.80114	-0.079809	0.00337915	2.38281	8.56852e-05	2.303
20	A8HNX3	33.08	31	6	0.135044	-0.66586	0.690696	0.135089	0.200792	-0.530771
21	A8HP06	20.79	49	11	0.626488	0.0939454	0.380216	0.19686	0.143879	0.290805
22	A8HP55	12.97	10	2	0.955834	0.0202289	0.030877	-0.634734	0.0707976	-0.614505
23	A8HP58	30	23	5	0.397871	0.55614	0.189414	-0.588702	0.93212	-0.032562
24	A8HP61	6.442	3	2	0.878427	0.0286589	0.656029	-0.0532564	0.871229	-0.0245975
25	A8HP84	34.22	59	13	0.221251	-0.634634	0.00592486	-2.37369	0.000294326	-3.00833
26	A8HP90	31.84	51	7	0.110018	-0.630398	0.746294	-0.154534	0.119722	-0.784932
27	A8HPB8	3.342	4	1	0.924205	0.0162252	0.0963861	-0.31961	0.0735061	-0.303385
28	A8HPF4	10	4	2	0.763007	0.191064	0.183067	-0.935575	0.254342	-0.744511
29	A8HPG8	8.247	9	2	0.0893175	0.617998	0.0454866	0.908259	0.000971011	1.52626
30	A8HPI1	9.412	7	3	0.45736	0.437844	0.1947	0.842815	0.0245168	1.28066
31	A8HPJ2	9.572	6	4	0.05498	-0.835657	0.00109375	-1.98239	0.000184577	-2.81805
32	A8HPL8	11.32	16	5	0.387592	-0.109744	0.0243222	0.405126	0.0100264	0.295382
33	A8HPM8	4.348	6	1	0.340668	0.571429	0.901461	-0.0752336	0.128225	0.496195
34	A8HQ81	19.66	12	5	0.223322	-0.620727	0.242997	0.566427	0.845465	-0.0543006
35	A8HQJ5	20.28	15	5	0.269748	0.247493	0.00116449	-0.849943	0.0122922	-0.60245
36	A8HQP1	7.874	4	2	0.0448387	0.240207	0.0207122	0.474662	0.00195557	0.714869
37	A8HQT1	35.83	63	15	0.304032	-0.310093	0.799304	0.0849077	0.472977	-0.225186
38	A8HQW1	39.53	43	9	0.307769	-0.106116	0.767973	-0.0556284	0.333892	-0.161745
39	A8HR39	10.12	7	3	0.0697394	0.184502	0.0190239	0.0559286	0.00989486	0.24043
40	A8HR79	8.647	16	3	0.384296	-0.633203	0.68454	-0.256068	0.12893	-0.889271
41	A8HRN2	7.258	12	1	0.602258	-0.419293	0.342588	0.630811	0.615267	0.211517
42	A8HRZ4	20.57	18	5	0.353082	0.313796	0.127498	0.887448	0.0218523	1.20124
43	A8HRZ9	27.78	27	4	0.354383	0.253422	0.0803829	0.738357	0.0151256	0.991779
44	A8HS14	8.73	28	4	0.865114	-0.024636	0.00417926	-0.8882	0.000615521	-0.912836
45	A8HS59	15.05	20	4	0.439405	-0.166399	0.130641	-0.484391	0.030072	-0.65079
46	A8HSE5	19.25	3	2	0.624289	-0.369419	0.453702	-0.528457	0.028948	-0.897876
47	A8HSL4	0.4917	4	3	0.527736	0.332988	0.0887532	-0.862487	0.194277	-0.529499
48	A8HSS0	4.664	4	2	0.243408	0.22911	0.00482762	-0.519202	0.0849649	-0.290092
49	A8HSU1	5.195	4	1	0.323281	0.295768	0.0130419	-1.19598	0.00415359	-0.900208
50	A8HSU7	21.13	12	5	0.126628	-0.422742	0.0894906	-0.26914	0.00682948	-0.691882
51	A8HSV0	3.719	8	1	0.485033	0.760153	0.775761	-0.302218	0.572002	0.457935
52	A8HTE2	1.309	6	1	0.501634	0.649035	0.898675	0.106123	0.148327	0.755158
53	A8HTK2	2.203	3	1	0.882046	0.0248465	0.0104104	-0.649845	0.00447199	-0.624998
54	A8HTX7	28	32	8	0.456595	-0.127823	0.539201	0.278446	0.672699	0.150623
55	A8HTY0	62.69	80	7	0.0320547	-0.648258	0.0144817	-1.73109	0.00111286	-2.37935
56	A8HVA3	63.11	137	13	0.348567	0.258324	0.0341326	0.845001	0.000170355	1.10333
57	A8HVD7	20.88	13	2	0.171638	0.349534	0.0858298	0.507803	0.0123944	0.857337
58	A8HVJ9	15.56	11	4	0.51257	-0.186973	0.974346	0.0257792	0.799426	-0.161193
59	A8HW56	3.182	4	2	0.82593	0.00403265	4.3371e-05	0.639856	3.56698e-06	0.643888
60	A8HWA8	20.03	52	14	0.646506	0.0567116	0.414505	0.182763	0.157772	0.239475
61	A8HWS8	9.744	3	2	0.0912628	-0.641975	0.0462017	-1.09056	0.00530824	-1.73253
62	A8HWX1	53.59	83	12	0.159737	0.408846	0.077508	0.553384	0.00946989	0.962229
63	A8HWZ6	4.444	6	2	0.929267	-0.0831724	0.146989	-1.44831	0.0373548	-1.53148
64	A8HWZ8	26.95	38	5	0.0407261	-0.286658	0.00452431	-1.01868	0.00010636	-1.30534
65	A8HX04	12.71	7	3	0.260896	-0.297254	0.525889	0.278307	0.952851	-0.0189474
66	A8HX38	48.16	107	23	0.140032	-0.605181	0.0787166	0.662432	0.848167	0.0572516
67	A8HX50	19.7	40	3	0.857778	0.080205	0.922512	-0.0457398	0.9005	0.0344652
68	A8HX54	13.06	46	5	0.908378	0.0583058	0.982813	-0.0100786	0.858179	0.0482272
69	A8HX89	21.14	5	2	0.170467	0.52235	0.322857	0.269133	0.0220439	0.791483
70	A8HXC5	5.811	3	2	0.372651	0.192099	0.696493	-0.0997995	0.592805	0.0922999
71	A8HXG5	9.917	4	1	0.556185	-0.270878	0.703175	-0.386341	0.388824	-0.657219
72	A8HXL8	32.68	76	12	0.147903	-0.292968	0.135804	-0.313815	0.0154235	-0.606784
73	A8HXM1	30.6	5	4	0.180627	-0.292495	0.00538931	-1.42327	0.000478409	-1.71576
74	A8HXT4	7.639	29	8	0.36155	-0.053251	0.19278	-0.124393	0.0265253	-0.177644
75	A8HXW8	11.53	13	4	0.116073	0.515577	0.346438	-0.461932	0.877034	0.0536448
76	A8HY43	41.84	36	8	0.154136	0.257198	0.0210351	-0.755703	0.0129384	-0.498505
77	A8HYN3	3.241	3	2	0.157354	0.484982	0.927678	0.0366489	0.17573	0.521631
78	A8HZC0	12.7	4	2	0.0416728	0.793087	0.28689	-0.155321	0.0333689	0.637766
79	A8HZZ1	20.88	22	9	0.940095	0.0232154	0.125686	-0.341196	0.163822	-0.317981
80	A8HZZ4	25.34	55	14	0.393924	0.173562	0.0671492	-0.502418	0.00518113	-0.328856
81	A8I0E2	7.874	4	1	0.922951	-0.0240566	0.0954325	0.491277	0.104189	0.46722
82	A8I0I1	18.32	41	3	0.653153	-0.145744	0.560954	-0.263703	0.277614	-0.409448
83	A8I164	18.18	34	11	0.502978	0.144203	0.0421827	0.74167	0.00592251	0.885873
84	A8I1B8	16.06	3	1	0.44455	0.239683	0.736609	-0.0873052	0.225712	0.152378
85	A8I1M5	1.605	8	1	0.895474	-0.0473961	0.842313	-0.0744725	0.738473	-0.121869
86	A8I247	10.12	5	3	0.637416	-0.178392	0.571475	-0.215957	0.00939658	-0.394349
87	A8I263	31.07	58	12	0.851634	0.0611489	0.0810394	0.431591	0.115145	0.49274
88	A8I268	7.394	27	7	0.264675	0.429813	0.000548591	-2.61988	0.0010363	-2.19006
89	A8I2T0	16.33	4	2	0.393511	0.346472	0.101785	-0.542315	0.540763	-0.195842
90	A8I2V3	48.99	40	7	0.348539	0.377108	0.389164	0.55499	0.0879623	0.932098
91	A8I382	15.16	10	3	0.88372	0.0474561	0.767722	0.10056	0.542441	0.148016
92	A8I3M4	22.54	15	4	0.330397	-0.30293	0.00797026	-1.5188	0.000552918	-1.82173
93	A8I3V3	4.895	10	2	0.131984	-0.155678	0.273218	0.164716	0.937695	0.00903794
94	A8I3W3	6.957	7	2	0.592919	0.160539	0.809787	-0.0858296	0.74788	0.0747091
95	A8I3X1	16.67	8	2	0.0820473	0.644531	0.00967285	-1.1613	0.0323222	-0.516774
96	A8I403	14	5	2	0.0276724	-0.932261	0.522598	-0.223675	0.0101444	-1.15594
97	A8I4P5	19.13	13	4	0.318603	-0.290608	0.177448	-0.422519	0.00328271	-0.713127
98	A8I4S9	2.301	13	3	0.539666	0.210228	0.0834176	0.840171	0.0162221	1.0504
99	A8I528	14.49	10	3	0.830306	-0.0647611	0.968839	0.0174982	0.907283	-0.0472629
100	A8I5A0	28.09	35	5	0.109443	0.407226	0.0050105	-0.940257	0.0260218	-0.533032
101	A8I5J8	9.6	24	4	0.789909	0.0557105	0.201813	-0.537587	0.133828	-0.481877
102	A8I5K1	6.874	17	3	0.432124	0.35172	0.0735887	1.44456	0.0147862	1.79628
103	A8I5N5	10	6	2	0.0521999	-0.728002	0.00980831	-1.24083	0.000729134	-1.96884
104	A8I5S5	9.662	13	2	0.522555	0.236812	0.127518	-0.754403	0.0833632	-0.517591
105	A8I629	6.877	4	3	0.155365	-0.449626	0.0882777	-0.735018	0.00128596	-1.18464
106	A8I683	3.544	17	1	0.170842	0.584391	0.0279408	1.59384	0.00131498	2.17823
107	A8I6C1	26.53	4	2	0.290145	0.375605	0.0198518	1.25824	0.00395076	1.63384
108	A8I6R4	11.26	10	3	0.157413	0.353104	0.987387	-0.00279957	0.0103931	0.350304
109	A8I6T5	2.977	10	3	0.383124	0.310635	0.28519	0.522085	0.0200622	0.83272
110	A8I748	8.378	26	2	0.00786568	1.39142	0.00919105	1.27198	0.000348963	2.66341
111	A8I751	5.011	7	2	0.014168	1.36022	0.00972972	1.18381	0.000458116	2.54403
112	A8I7N8	14.75	48	5	0.52519	-0.0961885	0.185534	0.288829	0.125786	0.19264
113	A8I7T1	5.859	10	4	0.736384	0.0356458	0.717018	0.0381922	0.225003	0.073838
114	A8I7T8	24.39	54	15	0.0183761	-0.288655	0.387173	0.0870632	0.0678084	-0.201592
115	A8I7W0	12.85	14	6	0.0345566	-1.10944	0.763685	0.0987943	0.00725928	-1.01065
116	A8I826	8.38	8	2	0.0171767	0.230395	0.359764	0.0886786	0.00511235	0.319073
117	A8I8A3	29.19	21	5	0.00605857	-0.610423	0.000741017	-1.01852	4.37704e-05	-1.62894
118	A8I8Z1	15.63	12	3	0.516805	0.21342	0.551704	0.231509	0.144355	0.444929
119	A8I8Z4	21.89	14	6	0.0676917	-0.433898	0.0013881	-1.06548	0.000268441	-1.49938
120	A8I972	1.635	10	1	0.831113	-0.183115	0.609624	-0.326742	0.375617	-0.509857
121	A8I980	24.62	20	6	0.0774198	-0.772767	0.0455856	-0.768547	0.000362301	-1.54131
122	A8I9A1	3.782	7	1	0.245786	0.285691	0.28375	0.290227	0.0531577	0.575918
123	A8I9D5	11.11	3	2	0.233969	0.0752894	0.0909033	-0.810922	0.0451429	-0.735633
124	A8I9I9	51.72	50	9	0.946667	0.016587	0.971619	-0.0187242	0.996128	-0.0021372
125	A8I9S6	6.759	5	2	0.220974	0.323568	0.505654	0.188479	0.0158143	0.512047
126	A8IA18	32	17	9	0.569337	0.318157	0.270391	-0.394886	0.839869	-0.0767287
127	A8IA39	4.342	3	2	0.886118	-0.0479625	0.281332	0.274932	0.291826	0.226969
128	A8IA42	6.599	4	1	0.141138	-0.44446	0.248751	-0.294579	0.0153107	-0.739039
129	A8IA45	15.28	28	6	0.472499	0.166255	0.0670914	0.418116	0.0337311	0.584371
130	A8IA77	3.132	3	1	0.246454	0.304461	0.959977	0.0112347	0.238056	0.315696
131	A8IA86	20	21	5	0.429825	0.355027	0.752595	-0.158968	0.589845	0.196059
132	A8IAA8	5.158	7	2	0.0637578	-0.214746	0.0157554	2.31004	0.00458633	2.09529
133	A8IAA9	8.919	5	3	0.386805	0.337699	0.228746	0.504774	0.0410499	0.842474
134	A8IAB5	4.225	14	2	0.698506	-0.387236	0.203411	1.30718	0.0792385	0.919944
135	A8IAN1	36.21	132	24	0.372387	-0.168309	0.115783	-0.355291	0.0101342	-0.5236
136	A8IAT4	24.68	67	13	0.159931	-0.342992	0.176725	-0.295882	0.00923414	-0.638875
137	A8IAV8	5.78	4	1	0.175553	0.461876	0.0246606	0.941406	0.000994817	1.40328
138	A8IBN3	7.399	5	2	0.0451894	-1.16721	0.82373	-0.0676364	0.00269588	-1.23485
139	A8ICC8	6.429	9	3	0.483598	0.16467	0.290441	-0.257075	0.342784	-0.0924045
140	A8ICE4	13.07	5	3	0.49674	-0.179387	0.00282987	-1.15371	0.00286781	-1.3331
141	A8ICF4	4.545	10	2	0.290761	0.168632	0.0364819	-0.662826	0.0470752	-0.494194
142	A8ICG9	14.16	22	4	0.69055	-0.32143	0.735736	0.241215	0.814154	-0.080215
143	A8ICT1	28.18	14	3	0.437765	-0.2231	0.609787	-0.185313	0.168706	-0.408413
144	A8ICT4	40	10	3	0.251282	0.340066	0.431343	0.296622	0.0936081	0.636688
145	A8ICV4	59.79	19	5	0.75113	0.194764	0.67713	0.22563	0.161411	0.420394
146	A8ID45	22.86	4	2	0.459726	0.508055	0.751347	0.257974	0.105529	0.766029
147	A8ID84	14.51	22	8	0.312367	0.341062	0.46825	-0.106127	0.336839	0.234935
148	A8IDN1	46.46	30	4	0.0561755	0.564779	0.601426	-0.12765	0.0438908	0.437129
149	A8IDT3	2.551	4	1	0.717551	0.173197	0.420778	0.437915	0.220954	0.611112
150	A8IE23	8.669	26	5	0.931675	0.03919	0.48954	0.232394	0.351371	0.271584
151	A8IGD9	44.68	87	9	0.207055	0.444741	0.0040625	-2.26337	0.00080933	-1.81863
152	A8IGH1	34.19	65	9	0.921675	-0.0567252	0.829401	-0.119965	0.547875	-0.17669
153	A8IGM2	1.77	5	1	0.347278	-0.220326	0.106423	0.375223	0.479911	0.154897
154	A8IGZ3	16.67	10	2	0.182356	0.225076	0.0358499	0.683912	0.00406511	0.908987
155	A8IH03	40.99	51	11	0.493157	-0.380269	0.140192	0.923481	0.0166516	0.543212
156	A8IH77	42.31	99	10	0.241751	0.712057	0.831799	0.0899079	0.0359576	0.801965
157	A8IHH9	5.921	3	2	0.404495	-0.513719	0.153197	0.895703	0.182613	0.381984
158	A8IHI1	3.532	4	1	0.66968	-0.208681	0.173042	-0.406648	0.143655	-0.615329
159	A8II42	8.468	17	5	0.543953	-0.0758593	0.626325	-0.0800424	0.282988	-0.155902
160	A8IID0	3.74	4	1	0.599674	-0.252694	0.31747	0.519377	0.604013	0.266683
161	A8III5	7.639	4	1	0.0672123	0.988831	0.336712	-0.445192	0.175181	0.543638
162	A8IIK8	7.755	30	9	0.999211	0.000117258	0.662794	-0.0854401	0.611199	-0.0853229
163	A8IJ19	2.239	4	1	0.0658528	0.431258	0.191467	0.427038	0.0190558	0.858296
164	A8IJ34	8.01	5	3	0.75375	0.155378	0.297891	-0.740089	0.175702	-0.584711
165	A8IJJ8	5.376	11	2	0.500377	-0.277398	0.32435	0.309351	0.90845	0.0319521
166	A8IJK6	12.26	5	3	0.796825	0.0556109	0.428745	0.253483	0.295954	0.309094
167	A8IJL3	15.46	7	3	0.948179	0.0143765	0.28163	-0.111803	0.597403	-0.0974264
168	A8IJQ4	16.2	15	3	0.0784513	-0.270784	0.45095	-0.293035	0.10856	-0.56382
169	A8IKE6	9.174	7	2	0.0444783	0.387326	0.948164	-0.0154601	0.0791102	0.371866
170	A8IKI9	25.77	45	10	0.959172	-0.0154308	0.0367202	0.469547	0.121226	0.454116
171	A8IKP1	35.38	5	2	0.00974794	-0.680087	0.293393	0.274713	0.0635725	-0.405374
172	A8IKQ0	7.47	15	4	0.5906	0.0986907	0.00329659	-0.899739	0.00377686	-0.801048
173	A8IKW6	16.98	7	3	0.492319	-0.348293	0.712257	0.162689	0.426653	-0.185605
174	A8IKZ2	6.952	4	1	0.183334	-1.1639	0.445175	0.383648	0.266332	-0.78025
175	A8IL08	9.354	13	4	0.386956	0.518747	0.226392	-0.426131	0.830714	0.0926156
176	A8IL21	4.688	10	1	0.906523	0.0449787	0.177078	0.400841	0.222912	0.445819
177	A8IL32	13.27	19	2	0.332325	0.460175	0.965541	-0.0175511	0.31092	0.442624
178	A8ILJ9	15.93	9	5	0.00929997	0.820891	0.0173033	0.69861	0.000307186	1.5195
179	A8IMK1	22.91	46	11	0.0709822	0.263829	0.745838	-0.0455438	0.059024	0.218285
180	A8IMN5	9.978	7	3	0.24456	0.589201	0.561503	0.294287	0.0536552	0.883488
181	A8IMP6	27.97	14	6	0.106872	-0.726594	0.743731	-0.0940339	0.0522708	-0.820628
182	A8IMY5	4.676	6	2	0.93897	-0.0156916	0.86398	0.0484337	0.875914	0.0327421
183	A8IMZ5	23.26	31	8	0.00634212	-1.13027	0.00835714	-1.59576	0.000320454	-2.72603
184	A8IN92	11.49	6	1	0.780547	-0.118152	0.181656	0.834967	0.196827	0.716815
185	A8INF1	0.7539	3	1	0.961227	0.0475785	0.940129	-0.128262	0.943057	-0.0806834
186	A8INS3	24.07	6	3	0.49702	-0.329593	0.604144	-0.141762	0.232046	-0.471355
187	A8IPI7	12.92	10	4	0.111936	0.393871	0.849128	-0.0684797	0.217666	0.325391
188	A8IQ05	17.81	18	8	0.439456	0.216566	0.538978	0.178814	0.0372223	0.39538
189	A8IQB8	2.993	6	1	0.885722	-0.0505933	0.554138	-0.106055	0.536784	-0.156648
190	A8IQC1	21.48	21	3	0.354288	-0.510765	0.807222	-0.194709	0.287282	-0.705473
191	A8IQE3	45.99	37	8	0.0762816	-0.430221	0.148471	-0.238216	0.0129689	-0.668437
192	A8IQQ1	1.17	3	1	0.861913	0.0755598	0.364532	0.311297	0.261076	0.386857
193	A8IQU3	57.32	479	25	0.270373	0.191863	0.0995161	0.42892	0.00402552	0.620782
194	A8IR98	12.11	6	3	0.493107	0.238677	0.154615	0.437065	0.0816964	0.675742
195	A8IRK4	30.59	61	14	0.134461	-0.473455	0.0710585	-0.672116	0.000382533	-1.14557
196	A8IRK5	11.45	11	3	0.155947	0.313051	0.768023	-0.0378356	0.126633	0.275216
197	A8IRT4	6.369	14	2	0.35716	0.264368	0.0808559	0.820504	0.00235254	1.08487
198	A8IRT5	13.22	4	1	0.962439	0.0233051	0.795539	0.116315	0.524183	0.13962
199	A8IRU6	39.23	71	14	0.172069	0.22546	0.0916581	0.10871	0.0227845	0.334171
200	A8IRV6	5.71	11	4	0.157864	-0.323512	0.171834	0.0749122	0.140321	-0.2486
201	A8ISA9	5.85	3	2	0.543811	-0.237719	0.605233	0.226869	0.971484	-0.0108494
202	A8ISZ1	6.363	8	4	0.0193449	-0.671166	0.555638	0.220969	0.156714	-0.450198
203	A8IT01	19.89	36	8	0.117347	-0.892161	0.305765	0.560021	0.24054	-0.33214
204	A8ITH8	20.62	42	10	0.0502323	-0.487645	0.138166	-0.267587	0.00250764	-0.755232
205	A8ITJ3	13.03	4	3	0.323187	-0.228917	0.0240082	-0.7848	0.00351908	-1.01372
206	A8ITS8	13.11	13	5	0.0711377	0.57008	0.703108	0.100999	0.021973	0.671079
207	A8ITU2	47.57	75	16	0.399762	-0.196075	0.0279134	0.987983	0.0076819	0.791908
208	A8ITU6	30.81	60	3	0.353687	-0.275074	0.0704829	0.768869	0.0330979	0.493795
209	A8IU49	3.493	4	1	0.468889	0.331659	0.0102099	2.23978	0.00160959	2.57144
210	A8IUC3	12.24	3	1	0.095595	-0.500318	0.0081099	-2.11174	0.000819547	-2.61206
211	A8IUI1	14.08	10	4	0.0168009	0.74918	0.016719	1.05815	0.000226866	1.80733
212	A8IUL9	17.69	6	2	0.642185	0.116175	0.453954	-0.285828	0.448988	-0.169653
213	A8IUU3	11.03	8	3	0.446269	-0.130299	0.013371	-0.411156	0.0115384	-0.541455
214	A8IUV7	53.67	50	11	0.756217	0.0840249	0.239271	-0.225427	0.512579	-0.141402
215	A8IV40	5.556	9	1	0.374051	-0.566951	0.565989	0.365113	0.625802	-0.201838
216	A8IVE2	9.023	5	3	0.714701	0.109868	0.163847	-0.427474	0.13274	-0.317606
217	A8IVF0	8.941	7	3	0.243445	0.182613	0.602154	-0.143386	0.862454	0.0392273
218	A8IVG0	11.48	53	11	0.0494747	0.261654	0.467126	0.126134	0.032548	0.387787
219	A8IVK1	23.17	42	8	0.348479	0.205607	0.149344	-0.411825	0.370315	-0.206218
220	A8IVM9	19.54	88	14	0.0416678	0.282585	0.0432392	-0.667161	0.0620639	-0.384576
221	A8IVN2	12.3	6	3	0.155989	0.336729	0.205939	-0.392792	0.788962	-0.0560633
222	A8IVR6	4.331	9	2	0.139916	0.314629	0.0568989	1.00765	0.00975433	1.32228
223	A8IVU0	38.92	19	8	0.077595	-0.553657	0.678227	-0.0930221	0.0353174	-0.646679
224	A8IVZ9	28.68	93	12	0.126523	0.325936	0.0724546	0.35539	0.00166622	0.681326
225	A8IW09	11.54	6	2	0.860639	0.0613724	0.160989	-0.561472	0.0196088	-0.5001
226	A8IW34	34.56	57	14	0.605899	0.0699072	0.989984	-0.00197739	0.359423	0.0679298
227	A8IW39	16.78	31	8	0.222609	-0.227423	0.0484659	-0.453807	0.00736826	-0.681229
228	A8IW44	26.14	12	3	0.120767	-0.333703	0.00371957	-0.762671	0.000610533	-1.09637
229	A8IW47	32.76	37	9	0.233744	0.238247	0.0782875	0.590274	0.0142583	0.828521
230	A8IW49	4.202	8	4	0.370017	0.236819	0.39711	0.280697	0.0526151	0.517516
231	A8IWA6	0.8632	4	1	0.210045	-0.568015	0.494795	0.385278	0.709234	-0.182736
232	A8IWD2	5.303	4	1	0.807951	-0.0990713	0.857468	-0.0411015	0.666595	-0.140173
233	A8IWJ3	18.09	10	5	0.932258	0.023669	0.2138	-0.33148	0.202708	-0.307811
234	A8IWJ8	27.66	17	7	0.0231693	0.47652	0.716614	0.0521012	0.00147559	0.528621
235	A8IWL3	1.552	4	1	0.891564	0.0379411	0.618784	0.244892	0.461087	0.282833
236	A8IWP2	9.195	4	1	0.30063	0.253185	0.000344838	-2.72271	2.6194e-05	-2.46953
237	A8IX80	8.444	13	6	0.698917	-0.201329	0.630119	-0.235468	0.0690181	-0.436797
238	A8IXE0	16.56	32	8	0.0724504	-0.957272	0.0112145	1.51322	0.0936416	0.555952
239	A8IXQ5	27.75	27	8	0.928372	-0.00944705	0.915443	0.0112476	0.983535	0.00180053
240	A8IXV0	10.48	28	6	0.199621	0.324337	0.966797	-0.00738119	0.15121	0.316956
241	A8IXZ0	36.57	109	18	0.832908	0.0544235	0.285193	0.429232	0.134878	0.483655
242	A8IY43	12.76	15	2	0.726052	-0.165338	0.2858	-0.470192	0.0406139	-0.63553
243	A8IY50	8.108	7	2	0.0199957	-1.04058	0.00150075	4.34924	0.000681024	3.30866
244	A8IYA1	15.15	32	5	0.253438	-0.210752	0.502163	0.113289	0.515469	-0.0974628
245	A8IYH9	54.96	154	21	0.619995	-0.192268	0.0639333	-1.05538	0.00782716	-1.24765
246	A8IYK1	6.931	18	7	0.189466	0.136695	0.0441452	0.410199	0.00363688	0.546894
247	A8IYP4	33.87	20	9	0.267043	-0.64932	0.0332247	-1.68725	0.000800848	-2.33657
248	A8IYS1	13.73	7	2	0.274763	-0.341926	0.0137509	-1.55973	0.000739279	-1.90165
249	A8IZ00	3.713	4	1	0.236141	0.355213	0.00176926	1.36704	0.000752355	1.72226
250	A8IZ36	17.76	3	2	0.59118	-0.463804	0.64529	-0.241969	0.218631	-0.705773
251	A8IZ71	23.36	7	3	0.361848	-0.514029	0.214112	-0.6131	0.0475547	-1.12713
252	A8IZK3	16.52	11	5	0.821097	-0.0617701	0.107785	-0.514738	0.0383631	-0.576508
253	A8IZS5	30.91	74	7	0.00769163	-0.851823	0.0177881	0.431198	0.0216203	-0.420625
254	A8IZU0	20.92	84	14	0.174143	0.27072	0.896984	-0.017339	0.0685599	0.253381
255	A8IZV9	13.21	140	15	0.649973	0.0573183	0.00643901	0.859215	0.00223501	0.916533
256	A8J014	6.972	8	3	0.6307	-0.08719	0.274538	0.193493	0.563958	0.106303
257	A8J087	16.07	11	5	0.536001	-0.205656	0.154147	-0.773072	0.0644618	-0.978728
258	A8J090	4.006	4	2	0.908707	-0.0572077	0.464989	0.444087	0.154509	0.386879
259	A8J094	9.901	4	2	0.705917	0.152837	0.0310156	1.43288	0.00792154	1.58572
260	A8J0B3	3.614	3	2	0.248187	-0.65598	0.25771	0.435379	0.519855	-0.220601
261	A8J0E4	61.17	351	25	0.715973	-0.0716688	0.036249	-1.13189	0.007018	-1.20356
262	A8J0E5	7.981	6	2	0.720659	-0.285173	0.236381	0.916567	0.107932	0.631394
263	A8J0I0	35.12	92	12	0.708077	0.0907517	0.567388	-0.155348	0.715036	-0.0645967
264	A8J0Q8	25.14	4	3	0.686336	0.0899877	0.883445	-0.07527	0.967505	0.0147177
265	A8J0R4	30.28	40	4	0.0578891	-0.647	0.556549	-0.220812	0.0238464	-0.867811
266	A8J0R7	24.23	50	8	0.354915	0.14566	0.069827	0.432276	0.0177442	0.577936
267	A8J129	19.4	22	5	0.979504	0.00292511	0.0242113	-0.610573	0.0111784	-0.607648
268	A8J173	17.84	47	6	0.502851	-0.0756561	0.90791	-0.0301488	0.624883	-0.105805
269	A8J1A3	8.725	9	2	0.221036	0.540644	0.0503532	-0.645772	0.704174	-0.105128
270	A8J1B6	37.66	51	12	0.633651	0.11513	0.237348	0.41141	0.113134	0.52654
271	A8J1G8	25.81	27	6	0.214261	0.497768	0.0656589	-0.554904	0.808658	-0.0571354
272	A8J1M9	26.49	14	2	0.0637772	0.534857	0.144782	-0.585712	0.812541	-0.0508547
273	A8J1N3	6.452	11	2	0.913745	0.0528261	0.0137168	1.62312	0.00757354	1.67594
274	A8J1N4	6.835	6	1	0.115208	-0.760811	0.000491612	4.14432	0.000421917	3.38351
275	A8J1S7	2.072	8	1	0.462146	-0.0729249	0.467565	0.28049	0.483234	0.207565
276	A8J1S8	22.45	26	9	0.036264	0.316675	0.0651512	0.438404	0.0043744	0.755079
277	A8J1T4	22.91	32	9	0.0079409	0.459397	0.717764	0.0439401	0.00693804	0.503337
278	A8J1Y2	5.429	11	3	0.902682	-0.0178776	0.000676737	1.91339	0.000105502	1.89551
279	A8J239	28.57	11	4	0.490334	-0.319833	0.191932	-0.706834	0.0418192	-1.02667
280	A8J282	36.94	22	9	0.498246	-0.191574	0.254853	0.386865	0.13119	0.195291
281	A8J290	63.22	74	8	0.040111	0.470723	0.0515952	0.357359	0.00223984	0.828082
282	A8J2G4	30.83	11	3	0.834815	0.0512113	0.1268	-0.351671	0.0882199	-0.30046
283	A8J2I5	16.58	8	4	0.731367	0.151177	0.525423	-0.231937	0.777365	-0.08076
284	A8J2L0	5.569	7	1	0.21661	0.356668	0.365045	-0.188659	0.33846	0.168009
285	A8J2P0	1.468	3	1	0.888413	-0.171823	0.896839	0.13546	0.965975	-0.0363632
286	A8J2R7	10.64	4	2	0.913674	-0.018878	0.0597443	0.422043	0.00590681	0.403165
287	A8J2S0	23.79	50	9	0.0397476	-0.227149	0.107361	-0.243092	0.00799382	-0.470241
288	A8J2S3	3.056	4	1	0.25281	-0.784329	0.0681983	-1.46707	0.00125547	-2.2514
289	A8J2W0	8.163	6	3	0.0126912	-0.673327	0.00228532	1.57559	0.0032997	0.902266
290	A8J2X6	31.07	51	11	0.300807	0.552208	0.599048	0.261062	0.000156324	0.81327
291	A8J2Z6	9.953	6	2	0.0444014	-0.364409	0.00193526	-0.36891	0.000959031	-0.733319
292	A8J311	26.05	19	5	0.764872	0.0442246	0.0360639	0.625916	0.0152629	0.67014
293	A8J355	9.657	15	3	0.149704	-0.195174	0.0243059	-0.482289	0.000507149	-0.677463
294	A8J3C3	21.09	5	3	0.235525	-0.234683	0.337673	-0.297152	0.0495321	-0.531835
295	A8J3F0	16.99	3	3	0.378048	-0.343216	0.496024	0.264458	0.729584	-0.0787577
296	A8J3F7	35.12	50	11	0.794948	0.0661949	0.204732	0.447483	0.118689	0.513678
297	A8J3L1	0.974	4	2	0.849415	-0.0339593	0.0350872	-0.596993	0.00869443	-0.630952
298	A8J3L3	16.57	18	4	0.506368	0.431117	0.765546	0.17601	0.0852802	0.607127
299	A8J3L6	35.12	43	4	0.157876	0.339433	0.529281	-0.148045	0.24845	0.191389
300	A8J3L9	22.97	51	12	0.184022	0.397517	0.361056	0.221609	0.0487736	0.619126
301	A8J3Q6	7.287	4	2	0.796669	0.110193	0.184926	0.355721	0.189646	0.465915
302	A8J3U9	33.91	62	11	0.0807974	0.223284	0.0119832	0.407975	0.000228844	0.631259
303	A8J3Y6	4.562	9	5	0.206674	0.332451	0.0774082	0.547104	0.0174136	0.879555
304	A8J3Z3	17.65	12	2	0.0556259	-0.80143	0.00906272	-1.49165	0.000601259	-2.29308
305	A8J3Z5	5.556	8	1	0.0529404	0.493535	0.00793801	-1.22833	0.0146967	-0.734796
306	A8J431	19.31	7	2	0.0722392	1.73366	0.26657	0.702271	0.00971218	2.43593
307	A8J493	15.17	13	2	0.10848	-0.411013	0.099446	-0.552866	0.0133348	-0.963879
308	A8J4D3	8.959	28	5	0.897581	0.0344022	0.0405316	0.857879	0.000635614	0.892282
309	A8J4I2	25.5	5	3	0.116492	-0.366305	0.0342802	1.07253	0.0494492	0.706225
310	A8J4K4	10.77	11	3	0.00384674	-0.50726	0.00399893	-1.12354	0.000124789	-1.6308
311	A8J4M0	4.545	5	1	0.0306803	-0.271551	0.0695215	0.401952	0.355038	0.1304
312	A8J4M8	18.62	5	2	0.101541	0.268686	0.316146	-0.180067	0.434037	0.0886187
313	A8J4R9	12.32	53	5	0.47728	0.150227	0.160688	0.327546	0.044636	0.477774
314	A8J4S1	24.23	63	7	0.11742	0.572922	0.604921	0.113678	0.0131269	0.6866
315	A8J4Z4	55.26	184	25	0.280694	0.195501	0.109221	0.396522	0.00877355	0.592023
316	A8J503	34.3	13	5	0.420874	-0.131875	0.00389519	-1.1358	0.000942181	-1.26768
317	A8J506	38.55	81	14	0.0447401	0.704309	0.0338628	0.968067	0.000474831	1.67238
318	A8J513	9.581	4	2	0.253302	-0.331584	0.492403	-0.201658	0.115519	-0.533242
319	A8J524	8.144	6	3	0.398042	-0.25988	0.314552	0.410065	0.596377	0.150185
320	A8J567	32.95	57	12	0.441932	0.28088	0.160345	-0.272875	0.972611	0.00800476
321	A8J597	18.67	4	2	0.0283552	-0.563508	0.131211	-0.453574	0.00399836	-1.01708
322	A8J5B8	16.63	8	4	0.011497	-0.408283	0.297739	0.33919	0.757204	-0.0690929
323	A8J5F7	3.357	11	2	0.0248318	0.40642	0.0108541	1.22207	0.000546869	1.62849
324	A8J5P7	27.07	54	12	0.119405	0.397767	0.155221	0.334966	0.0179163	0.732733
325	A8J5T0	54.46	74	6	0.0139075	0.691901	0.748676	-0.0739178	0.00981274	0.617983
326	A8J5Z0	11.25	7	4	0.0043119	-0.701666	0.567332	0.0924895	0.00473229	-0.609176
327	A8J646	10.84	13	4	0.246706	-0.262129	0.0210363	0.61486	0.0728299	0.352731
328	A8J6A7	8.232	3	2	0.761014	-0.0880821	0.631742	-0.104979	0.489974	-0.193061
329	A8J6A8	14.73	8	3	0.545228	-0.271058	0.173885	0.495867	0.37712	0.224809
330	A8J6C7	3.048	5	2	0.426391	0.676912	0.294723	-0.590102	0.869192	0.0868095
331	A8J6D1	26.07	23	7	0.342842	0.810037	0.174285	-1.00995	0.619839	-0.199918
332	A8J6J6	20.17	30	7	0.603245	-0.0868385	0.113693	-0.700079	0.0374815	-0.786918
333	A8J6K7	1.843	6	1	0.557695	0.19414	0.451243	0.238218	0.0772302	0.432358
334	A8J6K8	7.965	7	2	0.744537	0.130237	0.18057	0.898117	0.0429154	1.02835
335	A8J6Q7	6.375	13	3	0.0144077	-0.730852	0.106462	-0.269569	0.00169149	-1.00042
336	A8J6R7	7.673	12	2	0.977644	-0.0106538	0.0503629	0.857057	0.0617482	0.846403
337	A8J6V1	9.896	7	3	0.178838	0.424806	0.0881376	0.790738	0.0119807	1.21554
338	A8J6Y4	5.3	11	3	0.0382905	0.558418	0.0292244	1.01296	0.00178122	1.57137
339	A8J6Y8	45.09	128	17	0.869474	0.0272163	0.38761	-0.143593	0.164615	-0.116376
340	A8J725	6.074	19	3	0.652881	-0.10269	0.0214583	0.894889	0.00936209	0.792199
341	A8J740	22.31	10	2	0.357007	-0.62895	0.259228	0.70967	0.760534	0.0807202
342	A8J785	35.89	29	7	0.596659	0.358964	0.287668	-0.620344	0.522845	-0.261381
343	A8J7F6	24.58	42	10	0.3719	-0.0838475	0.0335607	0.39209	0.0335935	0.308242
344	A8J7H3	13.82	16	5	0.000384511	-0.818842	0.0262019	-0.876048	0.000552489	-1.69489
345	A8J7M2	4.611	3	1	0.113538	-0.511902	0.0828272	0.660071	0.297564	0.14817
346	A8J7T7	6.61	18	3	0.101381	0.389312	0.00414271	1.47781	0.000208992	1.86712
347	A8J7X9	15.16	18	5	0.150834	0.482384	0.0295122	1.05901	0.000458685	1.5414
348	A8J816	6.716	4	1	0.865348	0.0420958	0.0134466	3.15665	0.00229618	3.19875
349	A8J820	23.86	11	3	0.433029	-0.325056	0.0434893	-0.61767	0.0303271	-0.942726
350	A8J841	2.669	3	2	0.00283078	-1.46464	0.875347	0.0393296	0.000870698	-1.42531
351	A8J8B2	10.14	6	3	0.242364	-0.394892	0.0399122	-0.826468	0.00078997	-1.22136
352	A8J8M0	11.76	7	2	0.0119427	2.05504	0.016499	1.90637	4.31962e-05	3.96141
353	A8J8M5	14.12	13	6	0.0398782	-0.553884	0.0068771	-1.29383	0.00065335	-1.84772
354	A8J8M9	9.917	4	2	0.0328014	-0.432118	0.439823	-0.308257	0.0571906	-0.740375
355	A8J8Z2	3.381	4	2	0.827931	-0.0457384	0.0459726	1.04657	0.0131159	1.00083
356	A8J906	12.31	4	1	0.113604	-0.382907	0.256714	0.944018	0.339385	0.561112
357	A8J933	14.78	16	5	0.0118549	1.01101	0.0294577	0.634738	0.00066518	1.64575
358	A8J942	22.11	8	4	0.168266	-0.25998	0.110889	0.326929	0.680078	0.066949
359	A8J951	16.56	5	3	0.21211	0.399056	0.011383	-0.496624	0.656598	-0.0975681
360	A8J989	3.325	4	1	0.119789	-0.352004	0.08289	-0.747363	0.00760851	-1.09937
361	A8J995	9.756	4	2	0.0214438	0.588171	0.279592	0.319228	0.0108579	0.907398
362	A8J9D9	18.82	16	3	0.337057	-0.24776	0.00294596	-1.52474	0.000359071	-1.7725
363	A8J9F6	10.68	9	3	0.350699	0.183608	0.276185	-0.158316	0.85256	0.0252922
364	A8J9H8	23.33	19	3	0.784224	0.0368728	0.409061	-0.297207	0.349558	-0.260334
365	A8J9M0	48.89	59	10	0.414195	0.231013	0.0941005	0.575217	0.00385663	0.806231
366	A8J9Q1	2.523	4	1	0.0747982	-0.44653	0.0672238	0.5904	0.47835	0.143871
367	A8J9S7	4.969	3	2	0.528906	0.361175	0.243207	1.15917	0.0670125	1.52035
368	A8J9T5	38.94	55	9	0.010306	-1.25285	0.900678	-0.0352862	0.000696393	-1.28814
369	A8J9W0	13.57	15	4	0.243683	-0.400598	0.065667	-0.62091	0.00699731	-1.02151
370	A8J9X1	27.23	27	5	0.111417	0.365076	0.172534	0.295881	0.000176032	0.660957
371	A8J9Y1	24.27	7	5	0.523768	-0.252024	0.0589057	-0.794858	0.032311	-1.04688
372	A8JAL6	6.639	15	1	0.623492	-0.32164	0.0166516	-1.69377	0.0184933	-2.01541
373	A8JAQ8	8.633	4	1	0.602504	0.345051	0.906819	-0.0720091	0.440897	0.273042
374	A8JAV1	22.28	43	7	0.0182877	0.3819	0.00190597	1.38587	8.52953e-05	1.76777
375	A8JAW4	2.326	5	1	0.100786	-0.379451	0.408484	0.339817	0.897652	-0.0396342
376	A8JAX1	6.278	3	1	0.782029	-0.143637	0.128642	0.992956	0.00329027	0.849319
377	A8JB48	15.38	5	2	0.872585	0.0725404	0.0238158	1.21771	0.0297815	1.29025
378	A8JBC6	7.649	5	1	0.077122	0.551089	0.351179	0.460287	0.0268708	1.01138
379	A8JBF2	17.2	12	3	0.843568	0.0411569	0.810128	-0.10769	0.844716	-0.0665326
380	A8JBH7	16.55	11	2	0.251157	0.30334	0.182436	0.451855	0.0267546	0.755195
381	A8JBI5	4.248	6	2	0.525114	-0.100762	0.0422231	0.717977	0.00987049	0.617215
382	A8JBI9	3.659	9	2	0.156494	-0.278917	0.000721021	2.20622	1.58497e-06	1.92731
383	A8JBL3	11.84	22	4	0.220481	0.36288	0.322308	0.310538	0.0337384	0.673418
384	A8JBL6	12.62	15	6	0.130328	-0.469057	0.156639	-0.447714	0.012261	-0.91677
385	A8JBM7	1.237	4	1	0.685732	0.0876519	0.2398	0.394594	0.0798516	0.482245
386	A8JBU2	3.724	6	2	0.272185	0.372178	0.0318875	1.08094	0.000668797	1.45312
387	A8JBW0	10.11	7	3	0.283834	0.326819	0.0604218	-0.751458	0.039964	-0.424639
388	A8JC04	49.57	165	29	0.164632	0.122101	0.0740187	-0.317598	0.0880253	-0.195497
389	A8JC06	6.091	3	1	0.637215	0.128134	0.248543	0.296635	0.0385652	0.424769
390	A8JC21	16.92	21	5	0.0205667	-1.15518	0.0489084	-0.755054	0.000830181	-1.91023
391	A8JC42	45.45	12	5	0.306862	0.411951	0.284349	0.462833	0.0106347	0.874784
392	A8JC47	4.889	10	2	0.0533652	0.580836	0.0482524	-0.349338	0.188494	0.231499
393	A8JCA0	0.372	3	1	0.072372	-0.733835	0.0127051	-2.11986	0.000609456	-2.8537
394	A8JCE1	16.56	13	4	0.743219	0.121072	0.388135	-0.334681	0.523762	-0.213609
395	A8JCE9	7.65	8	2	0.107101	-0.211739	0.0425608	0.370189	0.208749	0.158451
396	A8JCF6	6.439	12	3	0.228992	0.227605	0.247538	0.198118	0.0156233	0.425723
397	A8JCK1	7.843	3	2	0.678036	0.081382	0.223396	0.284181	0.134656	0.365563
398	A8JCR6	9.202	6	3	0.157897	-0.671811	0.354296	-0.182461	0.0379203	-0.854271
399	A8JCS8	30.04	26	6	0.389765	-0.212255	0.226051	0.28039	0.548228	0.0681354
400	A8JCT1	47.11	50	1	0.0545057	0.424829	0.0568749	0.481259	0.00497092	0.906088
401	A8JCW5	8.656	6	3	0.826611	-0.0335467	0.903369	-0.0200501	0.481328	-0.0535967
402	A8JCW7	4.615	4	1	0.429898	0.298193	0.153401	0.542757	0.0597241	0.84095
403	A8JCX9	27.34	34	4	0.220818	-0.410282	0.701928	0.106363	0.0997984	-0.303919
404	A8JD06	6.176	8	2	0.0104337	1.83079	0.323914	0.389402	0.00202972	2.22019
405	A8JD33	19.31	29	5	0.643999	0.14734	0.561713	0.143954	0.347803	0.291294
406	A8JD42	9.481	6	3	0.548124	0.191183	0.00774008	1.54346	0.000392926	1.73465
407	A8JD45	4.626	3	2	0.0647602	-0.47605	0.848724	0.0638133	0.200473	-0.412236
408	A8JDA2	6.034	4	1	0.0327267	0.417352	0.0641763	0.418256	0.00219083	0.835609
409	A8JDA7	17.11	20	3	0.360437	0.193268	0.284884	-0.308086	0.396979	-0.114817
410	A8JDL5	51	59	8	0.834925	-0.0382655	0.138832	-0.297859	0.019738	-0.336125
411	A8JDL8	18.42	19	5	0.183109	0.277988	0.15759	-0.363268	0.420959	-0.0852802
412	A8JDN2	25.76	26	5	0.186277	0.138613	0.0019451	-0.353673	0.0345006	-0.21506
413	A8JDN8	21.88	10	3	0.723808	-0.0985021	0.00304781	-1.70342	0.000371781	-1.80192
414	A8JDP4	11.52	4	3	0.405736	-0.245066	0.0229403	-0.705264	0.0047848	-0.95033
415	A8JDP6	17.68	3	2	0.073176	-0.331942	0.0326588	-1.42196	0.00389686	-1.7539
416	A8JDR8	1.935	12	1	0.510748	0.317368	0.00615178	1.49348	0.00495994	1.81085
417	A8JDV9	16.98	22	5	0.903004	-0.0338833	0.18974	0.458227	0.0654569	0.424344
418	A8JE06	8.273	6	2	0.0853326	0.304477	0.278703	-0.292373	0.947632	0.0121038
419	A8JE10	36.87	157	15	0.568184	-0.123204	0.140315	-0.364815	0.00129048	-0.488019
420	A8JE12	11.45	3	2	0.207245	-0.354525	0.276881	0.315159	0.703381	-0.039366
421	A8JE35	11.58	5	2	0.13592	-0.741665	0.0910515	-0.655628	0.00342103	-1.39729
422	A8JE91	11.9	18	1	0.153107	-0.337853	0.110697	-0.308276	0.0099109	-0.646129
423	A8JE98	37.97	38	9	0.530813	0.0480804	0.0291416	0.328861	0.000789922	0.376941
424	A8JEF7	14.83	35	8	0.584085	-0.193993	0.0577055	0.872396	0.0110127	0.678403
425	A8JEM3	3.731	3	1	0.192601	-0.286149	0.0734856	-0.785541	0.00793337	-1.07169
426	A8JES1	8.333	19	2	0.165133	0.391415	0.0539818	-0.611795	0.28453	-0.220381
427	A8JEU4	21.66	47	12	0.652563	-0.0985027	0.0766296	0.39757	0.0708075	0.299067
428	A8JEV1	70.85	525	32	0.824083	0.0264113	0.00247611	-1.27795	6.477e-05	-1.25154
429	A8JEV9	13.12	16	5	0.494155	-0.102413	0.00537703	-0.991714	0.000392039	-1.09413
430	A8JF05	9.605	3	2	0.599232	-0.106242	0.0231251	-0.548456	0.0166685	-0.654699
431	A8JF15	25.57	20	5	0.800281	-0.0745852	0.192273	-0.490512	0.121278	-0.565097
432	A8JF66	19.35	19	4	0.381435	-0.407571	0.422338	-0.29925	0.0688894	-0.706821
433	A8JFB1	51	80	15	0.00471385	-0.844676	0.000616661	-1.25515	1.13755e-05	-2.09982
434	A8JFI7	23.89	35	8	0.541248	-0.318822	0.291389	0.499644	0.423822	0.180822
435	A8JFJ2	18.48	26	7	0.75484	-0.180348	0.474659	-0.420283	0.00331379	-0.600631
436	A8JFP5	13.78	4	2	0.122722	0.367932	0.00244982	-1.00149	0.0132709	-0.633559
437	A8JFR9	20.39	39	12	0.0921219	-0.310164	0.000206147	-0.719046	0.000524622	-1.02921
438	A8JFZ0	17.85	35	7	0.218261	0.389009	0.362577	-0.273694	0.407553	0.115316
439	A8JFZ2	2.644	6	3	0.923354	-0.0244664	0.20454	0.75415	0.103525	0.729684
440	A8JG03	6.776	4	2	0.295697	-0.578457	0.37288	-0.38161	0.0388772	-0.960068
441	A8JG04	3.717	5	1	0.299548	-0.821104	0.160186	-1.11113	0.00776791	-1.93224
442	A8JG56	29.97	25	7	0.115911	0.235481	0.53638	-0.0988915	0.335267	0.136589
443	A8JG73	15	7	2	0.415465	-0.311941	0.150092	0.612348	0.403582	0.300407
444	A8JGF4	22.15	22	8	0.00823222	-0.305045	0.904058	-0.0186025	0.0457998	-0.323648
445	A8JGI9	51.55	36	7	0.292541	-0.153931	0.00697442	-1.10888	0.00094588	-1.26281
446	A8JGK1	8.633	7	1	0.55611	-0.175435	0.479637	-0.287746	0.17941	-0.463181
447	A8JGR1	56.73	14	5	0.99513	-0.00249415	0.476446	0.664014	0.393326	0.66152
448	A8JGS2	37.14	26	5	0.0085332	-0.36302	7.35238e-05	-1.39435	1.62984e-06	-1.75737
449	A8JGV6	16.6	11	4	0.151409	0.182932	0.176587	0.438182	0.0329705	0.621115
450	A8JGW2	40.91	15	6	0.970759	-0.0137754	0.0154534	-2.39679	0.00192795	-2.41056
451	A8JGY3	18.55	18	4	0.0715034	0.344689	0.247908	-0.321655	0.885737	0.0230338
452	A8JH10	29.23	14	2	0.585493	-0.205798	0.744231	0.0964612	0.729982	-0.109337
453	A8JH12	26.76	36	2	0.633843	0.0709277	0.0963847	-0.446245	0.0967197	-0.375317
454	A8JH37	35.46	162	20	0.0442625	-0.834621	0.114609	0.742617	0.73795	-0.0920043
455	A8JH48	8.594	8	3	0.124748	-0.788863	0.142913	-0.79647	0.00288707	-1.58533
456	A8JH58	4.048	4	2	0.0928094	-0.391373	0.0110834	1.99573	0.00597777	1.60435
457	A8JH65	11.47	20	3	0.223278	0.336807	0.142622	-0.648935	0.303747	-0.312128
458	A8JH68	37.24	140	6	0.0567814	0.280166	0.00140396	-0.874776	0.00287345	-0.594611
459	A8JH72	8.197	4	2	0.064318	0.244656	0.082538	-0.407866	0.302285	-0.163211
460	A8JH98	27.67	43	9	0.535792	-0.0908542	0.0275212	0.846641	0.0109688	0.755787
461	A8JHA9	8.594	3	1	0.683879	-0.302032	0.241953	0.799434	0.349998	0.497401
462	A8JHB2	1.867	3	1	0.238183	-0.617926	0.137251	-0.303449	0.040318	-0.921375
463	A8JHB4	11.6	69	16	0.451789	0.0966598	0.0274137	0.502715	0.00106874	0.599374
464	A8JHB7	4.746	6	3	0.503776	-0.143936	0.0129306	-1.27599	0.000422254	-1.41992
465	A8JHC9	13.43	14	5	0.129453	0.283214	0.0203935	0.411754	0.0032463	0.694968
466	A8JHG2	9.023	4	1	0.649843	-0.247247	0.455433	0.405079	0.440234	0.157832
467	A8JHM2	2.083	15	2	0.000154869	-0.759948	0.112983	0.316003	0.0154797	-0.443945
468	A8JHN9	24.8	13	3	0.280296	0.303349	0.177233	0.251867	0.0329937	0.555216
469	A8JHQ7	9.36	4	2	0.993525	0.00308796	0.013609	1.20573	0.0204222	1.20882
470	A8JHR9	55.26	225	28	0.107312	0.578634	0.009582	1.86369	0.000392259	2.44232
471	A8JHU0	58.71	224	25	0.465976	0.316316	0.496418	0.291941	0.000309892	0.608257
472	A8JHU1	2.973	4	1	0.199584	-0.68911	0.133243	0.811116	0.521181	0.122006
473	A8JHU2	57.14	41	8	0.233922	-0.399497	0.402892	-0.241852	0.0732371	-0.641349
474	A8JHX9	6.746	9	5	0.197848	-0.258893	0.172659	0.441667	0.365729	0.182773
475	A8JI07	18.76	61	17	0.823763	0.0809867	0.297011	0.415771	0.0836437	0.496758
476	A8JI83	13.66	19	3	0.230842	0.598191	0.264126	0.563642	0.000702777	1.16183
477	A8JI94	17.32	4	2	0.208604	-0.605779	0.16519	-0.487144	0.0287784	-1.09292
478	A8JIB7	33.1	41	14	0.141273	-0.337547	0.162266	-0.237352	0.00835205	-0.574899
479	A8JIE0	37.96	62	7	0.567352	0.164444	0.210038	-0.385956	0.144458	-0.221512
480	A8JIJ1	6.437	13	3	0.949987	0.0338575	0.101978	1.13038	0.0472699	1.16424
481	A8JIR0	16	55	14	0.0550538	0.773264	0.607294	0.193176	0.0396602	0.96644
482	A8JJ55	10.2	3	2	0.203634	0.492842	0.00858457	0.870308	0.00417779	1.36315
483	A8JK20	26.8	3	1	0.293351	-0.320424	0.782522	0.109731	0.390654	-0.210693
484	A9LE42	2.03	4	3	0.997129	0.00248219	0.798156	0.200629	0.501499	0.203112
485	A9ZNH0	1.432	6	1	0.391822	-0.294861	0.0540333	1.03567	0.0282835	0.740804
486	B7U1J0	58.46	541	37	0.0205942	-0.24787	0.184013	-0.289182	0.0141521	-0.537052
487	C5HJ53	6.94	5	4	0.184267	0.377577	0.0592842	-0.985042	0.0808761	-0.607464
488	E3SC50	53.37	31	10	0.0121939	-0.837509	0.0816615	0.375417	0.0215077	-0.462092
489	O04923	10.89	15	5	0.0631196	1.44828	0.198559	1.0466	0.00369828	2.49488
490	O20032	16.79	10	2	0.848528	-0.15095	0.0321533	-1.95883	0.0111843	-2.10978
491	O22350	15.08	9	2	0.527198	-0.154719	0.354942	0.6008	0.321808	0.44608
492	O22472	8.316	10	3	0.141303	-0.308644	0.201698	-0.566656	0.0248712	-0.8753
493	O22547	4.832	10	3	0.0666482	-0.759805	0.224879	0.0563992	0.0279308	-0.703406
494	O24450	12.01	11	3	0.550535	0.511279	0.228667	-0.860246	0.488125	-0.348967
495	O48949	57.52	162	27	0.559001	-0.179865	0.658017	0.142291	0.860817	-0.0375735
496	O49822	17.74	26	5	0.412894	0.237128	0.358051	0.284897	0.0956729	0.522025
497	O65104	16.86	6	1	0.119947	-0.346237	0.865717	-0.13612	0.449583	-0.482357
498	P00877	43.58	475	36	0.0956216	-0.47215	0.00401564	-1.43131	0.000102384	-1.90346
499	P06007	12.5	44	6	0.398287	0.568493	0.150868	-0.817405	0.652144	-0.248912
500	P06541	79.83	786	46	0.337448	-0.249615	0.244857	-0.338236	0.00116371	-0.587851
501	P07753	6.25	13	3	0.683994	0.191278	0.0370658	-0.565149	0.331298	-0.37387
502	P07891	29.08	28	2	0.680803	0.087479	0.0768313	-0.504487	0.103207	-0.417008
503	P08475	23.78	82	9	0.190286	-0.86949	0.0301362	-1.94466	0.00020241	-2.81415
504	P09144	2.721	5	3	0.316921	0.916448	0.793559	0.119896	0.158436	1.03634
505	P10898	14.1	34	5	0.423249	0.397383	0.169168	-0.723348	0.510177	-0.325965
506	P11094	18.85	3	2	0.233088	-0.525776	0.00576131	-1.01848	0.00636664	-1.54425
507	P12154	5.06	25	4	0.337487	0.411441	0.886252	0.0546636	0.283252	0.466105
508	P17746	42.82	196	19	0.0187339	-0.68993	0.00649392	-0.757033	5.31975e-05	-1.44696
509	P22675	29.6	74	12	0.0279817	0.627926	0.0134757	0.77685	1.94419e-05	1.40478
510	P23489	14.71	9	4	0.160826	0.233292	0.0018101	-1.51588	0.000843672	-1.28259
511	P26565	7.143	4	1	0.171762	-0.486418	0.0128027	-1.49375	0.00209342	-1.98016
512	P37255	22.24	60	10	0.37153	0.474343	0.0834773	-0.697367	0.614616	-0.223025
513	P49202	16.34	14	3	0.250561	0.528496	0.0742518	-0.570613	0.895744	-0.0421166
514	P93106	52.39	243	25	0.773877	-0.117168	0.307516	0.435767	0.0387868	0.318598
515	Q00914	22.22	13	2	0.517581	0.481515	0.88601	0.0607267	0.285256	0.542242
516	Q05093	33.33	33	4	0.668578	0.129505	0.820113	0.0911437	0.553382	0.220649
517	Q08GN1	5.114	13	1	0.582357	-0.513318	0.156804	1.20218	0.282619	0.688866
518	Q0Z9B8	7.95	6	3	0.0140686	0.741009	0.00381093	-1.42414	0.0140381	-0.68313
519	Q0ZAI6	41.07	110	14	0.25287	0.230106	0.000602493	-1.80572	0.000111743	-1.57562
520	Q0ZAZ1	7.397	18	7	0.249739	0.125176	0.00109551	-0.717237	0.00185094	-0.592061
521	Q19VH4	22.89	14	4	0.251403	-0.46046	0.0149962	1.5087	0.00648668	1.04824
522	Q2VA40	16.06	32	10	0.990513	0.00197031	0.00208948	1.6856	0.000563862	1.68757
523	Q39568	45.25	82	12	0.602035	0.126538	0.281909	-0.175099	0.768414	-0.0485607
524	Q39588	17.1	7	4	0.00139519	0.318403	0.123657	-0.343298	0.852541	-0.024895
525	Q39589	57.68	392	24	0.217423	0.332697	0.0118698	-0.987236	0.0106029	-0.654539
526	Q39595	16.93	25	7	0.0862582	-0.314037	0.194387	0.133278	0.171897	-0.180759
527	Q39603	34.46	105	22	0.206536	-0.183947	0.120047	-0.202015	0.00516378	-0.385963
528	Q3HTK4	8.352	12	4	0.848739	-0.0703646	0.0096187	1.35224	0.00788617	1.28188
529	Q3HTK5	6.565	31	7	0.144226	0.280992	0.00240598	1.30634	5.27546e-05	1.58733
530	Q42680	64.62	38	7	0.87259	0.0330978	0.0563356	0.813154	0.0258309	0.846252
531	Q4VKB7	6.755	19	4	0.0511647	-0.358149	0.0104266	-0.788868	0.000177759	-1.14702
532	Q540H1	24.61	46	11	0.531666	-0.207939	0.284721	0.279875	0.769601	0.0719365
533	Q547G1	8.3	51	3	0.446523	0.355664	0.736153	-0.0822611	0.410472	0.273403
534	Q5NKW4	44.39	59	12	0.0799725	0.587653	0.582605	-0.0849873	0.0286526	0.502666
535	Q5QEB2	7.996	19	5	0.440583	-0.138252	0.0141257	-1.01541	0.000560568	-1.15366
536	Q5S7Y5	22.7	39	6	0.640457	-0.0397709	0.0372251	0.519787	0.0195121	0.480016
537	Q65Z22	7.853	28	3	0.00854398	-1.48005	0.00252573	2.96885	0.00629103	1.48881
538	Q66YD0	12.85	31	4	0.397705	0.214287	0.531385	-0.100385	0.46575	0.113902
539	Q6EMK7	43.19	83	15	0.918588	-0.0129421	0.154184	-0.431747	0.0870359	-0.444689
540	Q6JIY9	4.103	4	1	0.834492	-0.115366	0.0365307	1.10311	0.0551899	0.987739
541	Q6QAY1	5.584	4	1	0.0777484	0.328607	0.0561662	0.283879	0.00351188	0.612487
542	Q6QAY3	37.68	17	5	0.0563645	0.24256	0.0841142	0.234174	0.000443917	0.476734
543	Q6S7R7	4.808	4	1	0.539748	-0.609223	0.197941	0.862479	0.740987	0.253256
544	Q6UKY3	9.091	24	2	0.0860801	0.686328	0.403999	0.266145	0.00153156	0.952473
545	Q6UKY5	39.32	120	7	0.0704158	-0.904958	0.0684146	1.15646	0.305891	0.251507
546	Q6UKY6	14.73	32	7	0.157203	0.467674	0.254558	0.503601	0.0204994	0.971275
547	Q6UP30	12.99	10	2	0.223984	0.566756	0.682493	0.160233	0.000938972	0.726989
548	Q6V506	11.08	5	3	0.636141	-0.203658	0.323875	0.350256	0.536398	0.146598
549	Q6V9A9	45.54	10	4	0.478189	0.111363	0.0535434	0.107724	0.115675	0.219087
550	Q6V9B1	12.12	3	2	0.624163	-0.136045	0.560454	0.314268	0.661416	0.178223
551	Q6V9B2	2.273	6	1	0.612406	0.0736691	0.202294	0.442652	0.0606798	0.516321
552	Q6V9B3	15.96	5	4	0.991913	-0.00387448	0.453403	0.41168	0.341099	0.407805
553	Q6X898	34.62	97	20	0.120697	-0.31039	0.0146557	-0.83246	0.00127507	-1.14285
554	Q6Y682	16.21	26	7	0.563209	0.105097	0.0395627	-0.404262	0.123508	-0.299166
555	Q70DX8	6.193	3	2	0.19599	-0.729644	0.0864999	-1.02716	0.000196819	-1.75681
556	Q75NZ1	53.05	156	22	0.00734421	0.340644	0.000243223	-2.16209	3.47548e-05	-1.82144
557	Q75T33	20.63	34	7	0.250957	0.330886	0.0986011	0.536147	0.00865929	0.867033
558	Q75VY7	12.35	14	2	0.844405	0.078473	0.717237	0.108807	0.564473	0.18728
559	Q84U22	28.81	14	6	0.150746	-0.752612	0.0666511	-0.8919	0.00933521	-1.64451
560	Q84X70	19.75	7	3	0.596874	0.0919878	0.101532	-0.221737	0.410762	-0.129749
561	Q84X75	15.22	10	4	0.294513	-0.347072	0.330244	0.292924	0.763143	-0.0541477
562	Q84X82	1.549	9	5	0.0583157	0.347184	0.0106285	0.838921	0.000400314	1.18611
563	Q84Y02	10.79	10	2	0.910677	0.0696751	0.795988	0.142789	0.634105	0.212464
564	Q85KI7	11.98	29	8	0.403765	0.348009	0.926605	0.0356124	0.118791	0.383621
565	Q8GV23	10.93	4	2	0.537192	-0.145079	0.0123549	-0.925763	0.00376699	-1.07084
566	Q8HTL1	28.49	8	4	0.177937	-0.449895	0.0130095	-1.04806	0.00164549	-1.49795
567	Q8HTL2	21.94	9	4	0.139179	-0.257725	0.0437346	-0.962101	0.00582832	-1.21983
568	Q8HTL5	15.43	10	2	0.34558	0.872706	0.391481	-0.502393	0.577348	0.370312
569	Q8LK22	26.67	17	4	0.32429	0.43682	0.111105	0.788547	0.011007	1.22537
570	Q8S3U0	17.97	87	4	0.316164	0.375584	0.646527	-0.111855	0.412972	0.263729
571	Q8W4V3	24.23	90	12	0.0721148	0.33867	0.0085314	-0.778525	0.0280519	-0.439855
572	Q93WE2	1.287	6	1	0.00589964	-0.859929	0.004544	-0.591483	7.30136e-05	-1.45141
573	Q93WL4	21.01	98	1	0.361686	0.369316	0.562012	-0.137407	0.477689	0.231909
574	Q945T2	36.82	23	8	0.859632	0.0178601	0.00351576	-0.318242	0.0178103	-0.300382
575	Q96550	49.56	240	27	0.0250026	0.304577	0.0101443	0.331812	0.000700171	0.636389
576	Q9AXF6	29.32	105	4	0.39231	0.400571	0.642867	-0.142278	0.478741	0.258294
577	Q9AXJ2	18.71	84	5	0.473417	0.439444	0.660852	-0.246532	0.470253	0.192912
578	Q9FDV9	5.983	4	2	0.694133	0.250733	0.0153338	1.0966	0.0395874	1.34733
579	Q9FE86	45.11	77	9	0.82211	-0.15096	0.662448	0.273536	0.691639	0.122576
580	Q9FEH5	3.704	3	1	0.334986	-0.313375	0.55957	0.298472	0.972705	-0.0149036
581	Q9FEK6	11.42	12	3	0.487299	0.158624	0.420797	-0.316335	0.621604	-0.15771
582	Q9FNS5	27.23	35	9	0.249267	-0.138258	0.0173567	-0.370606	0.00452946	-0.508864
583	Q9FPQ6	5.766	29	4	0.18812	0.0959724	0.00174819	1.51471	0.000107193	1.61068
584	Q9LLL6	8.366	16	4	0.759582	-0.228779	0.164063	-0.815857	0.168723	-1.04464
585	Q9S7V1	7.945	8	3	0.029247	-0.867469	0.491599	-0.150565	0.00176808	-1.01803
586	Q9SW75	18.31	18	4	0.86246	-0.0559853	0.870262	0.029407	0.90032	-0.0265783
587	Q9ZSJ4	17.54	74	2	0.481001	0.233863	0.675119	-0.100713	0.661168	0.133151
